# Supplementary material
Source: PubMed Central journal article supplement (PMC3870711)
Supplement: 1320578110_pnas.201320578SI.pdf [file 1320578110_pnas.201320578SI.pdf]

# Supporting Information

Peterson et al. 10.1073/pnas.1320578110

## SI Text

In this paper, we have two aims: (*i*) to use maximum entropy to identify a general functional form for situations involving cost-minus-benefit constraints, and (*ii*) to fit data over a broad range of contexts. For *i*, maximum entropy predicts an exponential of a digamma function, provided that  $k_0$  is known; it also shows how to compute a full distribution if we are given a single quantity,  $\langle w \rangle$ . For *ii*, our aim is just to do simple curve-fitting of data, given the mathematical form from *i*. In this case, we have no microscopic model for  $k_0$ , so we know neither  $k_0$  nor  $\mu^\circ$ . In this case, our objective is not to find the full distribution from  $\langle w \rangle$ ; rather, for *ii*, we are given the full distribution function, and our objective is to find the best values of  $k_0$  and  $\mu^\circ$  that fit it.

Our fitting procedure is as follows. We use the maximum-likelihood estimation function `mle` function in MatLab, with probability distribution specified by Eq. 7. Table 1 shows estimated  $\mu^\circ$  and  $k_0$  values, with 95% confidence intervals. We calculate goodness-of-fit  $P$  values using the Monte Carlo simulation procedure (based on the Kolmogorov–Smirnov test) described in ref. 1. The 13 datasets shown here are above the  $P=0.05$  statistical significance threshold proposed in ref. 1.  $P$  values shown in Table 1 are based on 1,000 simulations for each dataset.

We fit Eqs. 7 to 13 data sets:

- Project membership on the social coding Web site GitHub (downloaded from [konect.uni-koblenz.de](http://konect.uni-koblenz.de)).

1. Clauset A, Shalizi C, Newman M (2009) Power-law distributions in empirical data. *SIAM Rev* 51(4):661–703.
2. Boguñá M, Pastor-Satorras R, Díaz-Guilera A, Arenas A (2004) Models of social networks based on social distance attachment. *Phys Rev E Stat Nonlin Soft Matter Phys* 70(5 Pt 2):056122.
3. Clauset A, Young M, Gleditsch K (2007) On the frequency of severe terrorist events. *J Conflict Resolut* 51(1):58–87.
4. Viswanath B, Mislove A, Cha M, Gummadi K (2009) On the evolution of user interaction in Facebook. *Proceedings of the Second ACM SIGCOMM Workshop on Social Networks*.

- Edits made by users of the English-language Wikipedia.
- Interactions between users of the Pretty Good Privacy secure data transfer algorithm (2).
- Words occurring immediately after one another in a Spanish book (downloaded from [konect.uni-koblenz.de](http://konect.uni-koblenz.de)).
- Deaths resulting from terrorist attacks from February 1968 to June 2006 (3).
- Wall posts by users to their walls on the social networking Web site Facebook, from a 2009 crawl of New Orleans Facebook (4).
- Pairwise, physical protein–protein interactions (PPI) of proteins detected in small-scale PPI network data, in yeast (*Saccharomyces cerevisiae*), fruit flies (*Drosophila melanogaster*), and humans (*Homo sapiens*) (5).
- Replies between users of the social news Web site Digg (6).
- Friendships between users of the Petster social networking site Hamsterster (downloaded from [konect.uni-koblenz.de](http://konect.uni-koblenz.de)).
- Occurrences of unique words in the novel *Moby Dick* (7).
- Class–class dependencies in the software libraries JUNG and javax (downloaded from [konect.uni-koblenz.de](http://konect.uni-koblenz.de)).

An overlay of all fits and datasets is shown in Fig. 3. Individual parameters and fits are shown in Table 1 and Fig. 2. A scatterplot of our maximum-likelihood estimates of  $\mu^\circ$  and  $1/k_0$  is shown in Fig. S1.

Available at <http://conferences.sigcomm.org/sigcomm/2009/workshops/wosn/>. Accessed June 1, 2012.

5. Patil A, Nakai K, Nakamura H (2011) HitPredict: A database of quality assessed protein-protein interactions in nine species. *Nucleic Acids Res* 39(Database issue, suppl 1):D744–D749.
6. Choudhury MD, Sundaram H, John A, Seligmann DD (2009) Social synchrony: Predicting mimicry of user actions in online social media. *Proc IEEE CSE'09*, 10.1109/CSE.2009.439.
7. Newman M (2005) Power laws, Pareto distributions and Zipf's law. *Contemp Phys* 46(5):323–351.

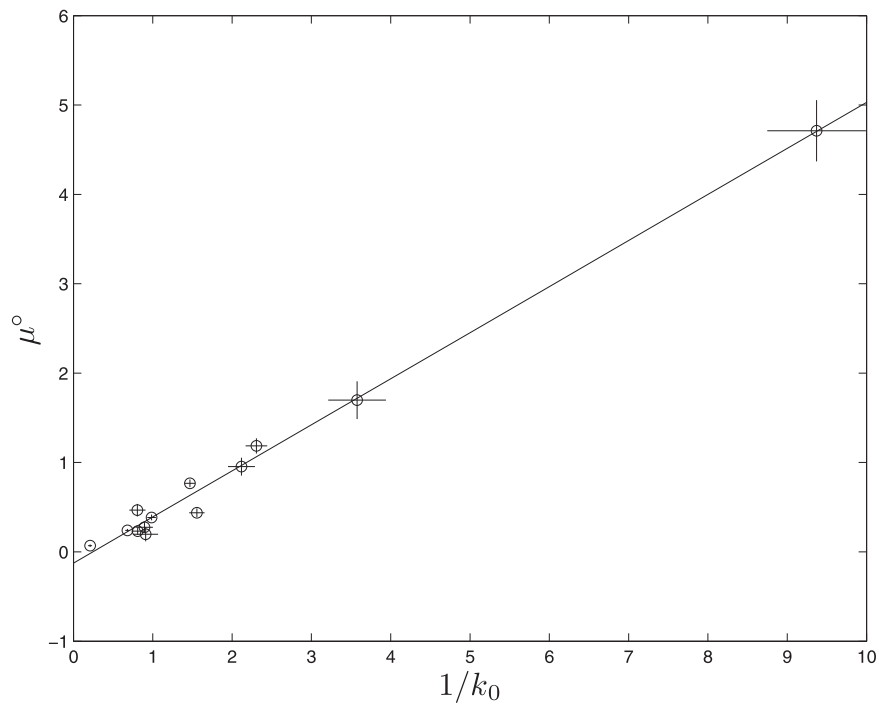

**Fig. S1.** The  $\mu_i^o$  plotted against  $1/k_0$  for the 13 data sets listed in Table 1. Error bars are 95% confidence intervals. Linear regression is shown as a solid line,  $\mu_i^o = 0.516k_0^{-1} - 0.125$  ( $R^2 = 0.991$ ). Each point on this plot represents an empirical data set.
